# Supplementary material for: Attention Deficit in Children With Attention Deficit Hyperactivity Disorder at Primary School Age Measured With the Attention Network Test (Ant): A Protocol for a Systematic Review and Meta-analysis
Source: Research Square preprint supplement (doi:10.21203/rs.3.rs-688069/v1), 2021-07-12
Supplement: Supplementary file 1 [file 33a7e517b8b02018e4ad5b33.docx]

SEARCH STRATEGY

**Information sources:** The following electronic databases will be searched: PubMed, PsycInfo, Web of Science, EMBASE, DARE, and the Cochrane Library. Electronic database searching will be complemented by manual data searches. Reference lists of the included review articles were checked to identify any additional studies. We do not limit the year of publication or the language if an English translation of the abstract is available.

**Search:** Literature search strategies will be developed using Medical Subject Headings (MeSH) or equivalent and text word terms and words related to the nosologically unit and the attention assessment tool.

**The method of searching using as an example of the PubMed database:**

# 1. Search "attention deficit disorder with hyperactivity" [MeSH] OR ADHD

# 2. Search "Attentional Network Test" OR "Attentional Networks Test" OR "Attentional Network Task" OR "Attentional Networks task" OR "Attention Network Test" OR "Attention Networks Test" OR "Attention Network Task" OR "Attention Networks task."

# 3. Search # 1 AND # 2
